# Supplementary material for: A simple, rapid and low-cost staining method for gel-electrophoresis separated phosphoproteins via the fluorescent purpurin dye
Source: Royal Society of Chemistry journal article supplement (doi:10.1039/c4an01334d), 2014-09-01
Supplement: c4an01334d1.pdf [file c4an01334d1.pdf]

## Supporting Information

### **A simple, rapid and low-cost staining of phosphoprotein gel electrophoresis via fluorescent dye of purpurin**

**Weitao Cong,** <sup>a, d, 1</sup> **Jiayi Shen,** <sup>a, 1</sup> **Yuanhu Xuan,** <sup>a, 1</sup> **Xinliang Zhu,** <sup>a</sup> **Maowei Ni,** <sup>c</sup>  
**Zhongxin Zhu,** <sup>a, d</sup> **Guoying Hong,** <sup>a, d</sup> **Xianghong Lu,** <sup>\*b</sup> and **Litai Jin,** <sup>\* a, d</sup>

<sup>a</sup>School of Pharmaceutical Sciences, Key Laboratory of Biotechnology Pharmaceutical Engineering, Wenzhou Medical University, Wenzhou, Zhejiang, China

<sup>b</sup>The Sixth Affiliated Hospital of Wenzhou Medical University, Lishui, Zhejiang, P. R. China

<sup>c</sup>Zhejiang Cancer Hospital, Hangzhou, Zhejiang, P. R. China

<sup>d</sup>Wenzhou Undersun Biotechnology Co., Ltd. Wenzhou, Zhejiang, China

**Correspondence:** Prof. Li-Tai Jin, or Prof. Xiang-Hong Lu, Zhejiang Provincial Key Laboratory of Biotechnology Pharmaceutical Engineering, Wenzhou Medical University, Wenzhou 325035, P. R. China.

(**Fax:** +86-577-86699790; **Phone:** +86-577-86699790; **E-mail:** [jin\\_litai@126.com](mailto:jin_litai@126.com) or [luxh0393@163.com](mailto:luxh0393@163.com))

<sup>1</sup>These authors have equally contributed to this work.

**Keywords:** Purpurin/Phosphoprotein stain/Pro-Q Diamond/SDS-PAGE

#### **Abbreviations**

MeOH, methanol/NaAc, Sodium acetate trihydrate.

## Supplementary Material

**Table S1.** List of the identified phosphopeptides from mice brains in 2-D SDS-PAGE with LC/MS.

| Spot No | Entry name  | Description                      | Mr     | pI   | Phosphorylated Peptide                | Ion Score | E-value | Ion Precursor | Ion Charge |
|---------|-------------|----------------------------------|--------|------|---------------------------------------|-----------|---------|---------------|------------|
| 1       | NFM_MOUSE   | Neurofilament medium polypeptide | 95973  | 4.76 | K.GVVTNGLDVS*PAEEK.K                  | 59        | 5.6e-5  | 798.24        | 2          |
|         |             |                                  |        |      | K.AKSPMPKS*PVVEVKPKPEAK.A             | 51        | 0.00087 | 758.81        | 3          |
| 2       | SPG7_MOUSE  | Paraplegin                       | 86170  | 4.96 | R.VTS*GAQDDLRLK.V                     | 46        | 0.011   | 635.93        | 2          |
| 3       | NFL_MOUSE   | Neurofilament light polypeptide  | 61528  | 4.62 | K.KEES*AGEEQVAK.K                     | 79        | 2.5e-6  | 693.00        | 2          |
|         |             |                                  |        |      | K.AEEAKDEPPS*EGEAEEEEK.E              | 75        | 5e-6    | 1092.17       | 2          |
| 4       | VATB2_MOUSE | Ig gamma-3 chain C region        | 56857  | 4.57 | R.S*GQVLEVS*GSK.A                     | 46        | 0.012   | 626.35        | 2          |
| 5       | NAB2_MOUSE  | NGFI-A-binding protein 2         | 56827  | 6.40 | K.IS*ET*AGT*RKGS*MS*NGHGSPGEK.A       | 65        | 9.8e-6  | 863.60        | 3          |
| 6       | TBB3_MOUSE  | Tubulin beta-3 cha               | 50842  | 4.82 | K.VAVCDIPPRGLKMS*STFIGNSTAIQELFK.R    | 42        | 0.0034  | 1092.70       | 3          |
| 7       | TBA4A_MOUSE | Tubulin alpha-4A chain           | 50697  | 5.37 | K.LAEQCS*GLQGFLIYRSFSGGTGSGFTSLLMER.L | 43        | 0.0091  | 1179.65       | 3          |
| 8       | IGHG3_MOUSE | Ig gamma-3 chain C region        | 44472  | 6.68 | R.AQTPQVY*T*IPPRE                     | 39        | 0.0089  | 543.40        | 3          |
| 9       | FGL1_MOUSE  | Fibrinogen-like protein          | 36702  | 5.48 | K.GSENS*FIDLGGK.R                     | 42        | 0.009   | 652.52        | 2          |
| 10      | LAMA2_MOUSE | Laminin subunit alpha-2          | 351638 | 5.75 | R.CDCPPGYS*GLSCETCAPGFYR.L            | 55        | 0.0014  | 845.06        | 3          |
| 11      | PSA3_MOUSE  | Proteasome subunit alpha type-3  | 28615  | 5.29 | K.ESLKEEDES*DDDNM.-                   | 50        | 0.00013 | 876.17        | 2          |

**Table S2.** List of the identified phosphopeptides from human fibroblasts in 2-D SDS-PAGE with LC/MS.

| Spot No | Entry name  | Description                                     | Mr    | pI   | Phosphorylated Peptide            | Ion Score | E-value | Ion Precursor | Ion Charge |
|---------|-------------|-------------------------------------------------|-------|------|-----------------------------------|-----------|---------|---------------|------------|
| 1       | DREB_HUMAN  | Drebrin                                         | 71842 | 4.41 | R.SPS*DSSTASTPVAEQIER.A           | 87        | 6.1e-8  | 971.79        | 2          |
|         |             |                                                 |       |      | R.LREDENAEPVGTTYQKT*DAAVEMK.R     | 52        | 0.00016 | 925.83        | 3          |
| 2       | FBP1L_HUMAN | Formin-binding protein 1-like                   | 70390 | 6.12 | K.MKDVY*EKNPQMGDPGS*LQPK.L        | 47        | 0.0027  | 818.68        | 3          |
| 3       | FETUA_HUMAN | Alpha-2-HS-glycoprotein                         | 40098 | 5.48 | K.CDSSPDS*AEDVR.K                 | 79        | 7.4e-7  | 709.60        | 2          |
|         |             |                                                 |       |      | K.CDSSPDS*AEDVRK.V                | 69        | 0.00022 | 773.66        | 2          |
| 4       | AKT3_HUMAN  | RAC-gamma serine/threonine-protein kinase       | 56195 | 5.72 | R.Y*FLLK.T                        | 50        | 0.0033  | 763.46        | 3          |
| 5       | PTN5_HUMAN  | Formin-binding protein 1-like                   | 70390 | 6.12 | K.MKDVY*EKNPQMGDPGS*LQPK.L        | 51        | 0.00075 | 818.68        | 3          |
| 6       | ARFG2_HUMAN | ADP-ribosylation factor GTPase-activating pro 2 | 57027 | 8.07 | R.WDT*DAAWGMDR.V                  | 47        | 0.0062  | 709.64        | 2          |
| 7       | DC1L1_HUMAN | Cytoplasmic dynein 1 light intermediate chain 1 | 56829 | 6.01 | R.T*PNRSVSSNVASVSPIPAGSK.K        | 60        | 0.00014 | 964.84        | 3          |
| 8       | TPM1_HUMAN  | Tropomyosin alpha-1 chain                       | 32746 | 4.69 | K.YS*EALKDAQEK.L                  | 56        | 0.00094 | 681.21        | 2          |
| 9       | CHKB_HUMAN  | Choline/ethanolamine kinase                     | 45585 | 5.35 | R.EPVL*AAIATK.M                   | 50        | 0.0047  | 589.66        | 2          |
| 10      | ACTS_HUMAN  | Actin, alpha skeletal muscle                    | 42366 | 5.23 | K.CDIDIRKDL*ANNVMS*GGTTMYPGIADR.M | 46        | 0.0036  | 1108.47       | 3          |
| 11      | CA198_HUMAN | Uncharacterized protein C1orf198                | 36438 | 5.60 | R.MAS*MAAAIAASRS*AVMSGNRPLDDR.E   | 40        | 0.02    | 1363.33       | 2          |
| 12      | CO029_HUMAN | Uncharacterized protein C15orf29                | 35201 | 5.18 | K.IS*NFTNKNMK.E                   | 41        | 0.0068  | 458.04        | 3          |

**Table S3.** Characteristics comparison of purpurin stain with Pro-Q Diamond stain for phosphoprotein detection in SDS-PAGE.

| <b>Methods</b>        | <b>Purpurin stain</b> | <b>Pro-Q Diamond stain</b> |
|-----------------------|-----------------------|----------------------------|
| <b>Elapsed time</b>   | ~60 min               | ~210 min                   |
| <b>Sensitivity</b>    | 4-8 ng                | 8-16 ng                    |
| <b>Cost (per use)</b> | 0.8 \$                | 40 \$                      |
| <b>Steps</b>          | 2                     | 9                          |

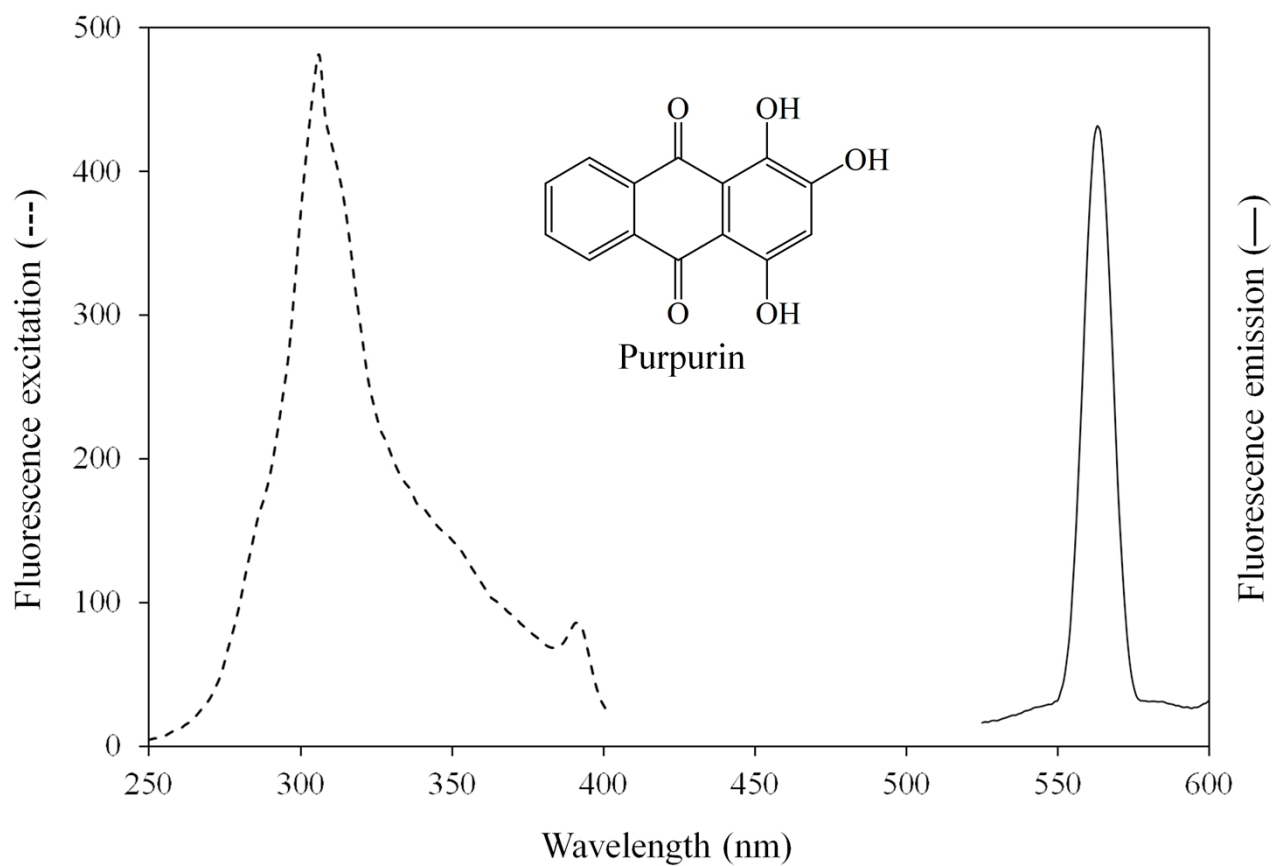

**Supplemental Figure 1.** Chemical structure and fluorescence excitation/emission spectra of purpurin.

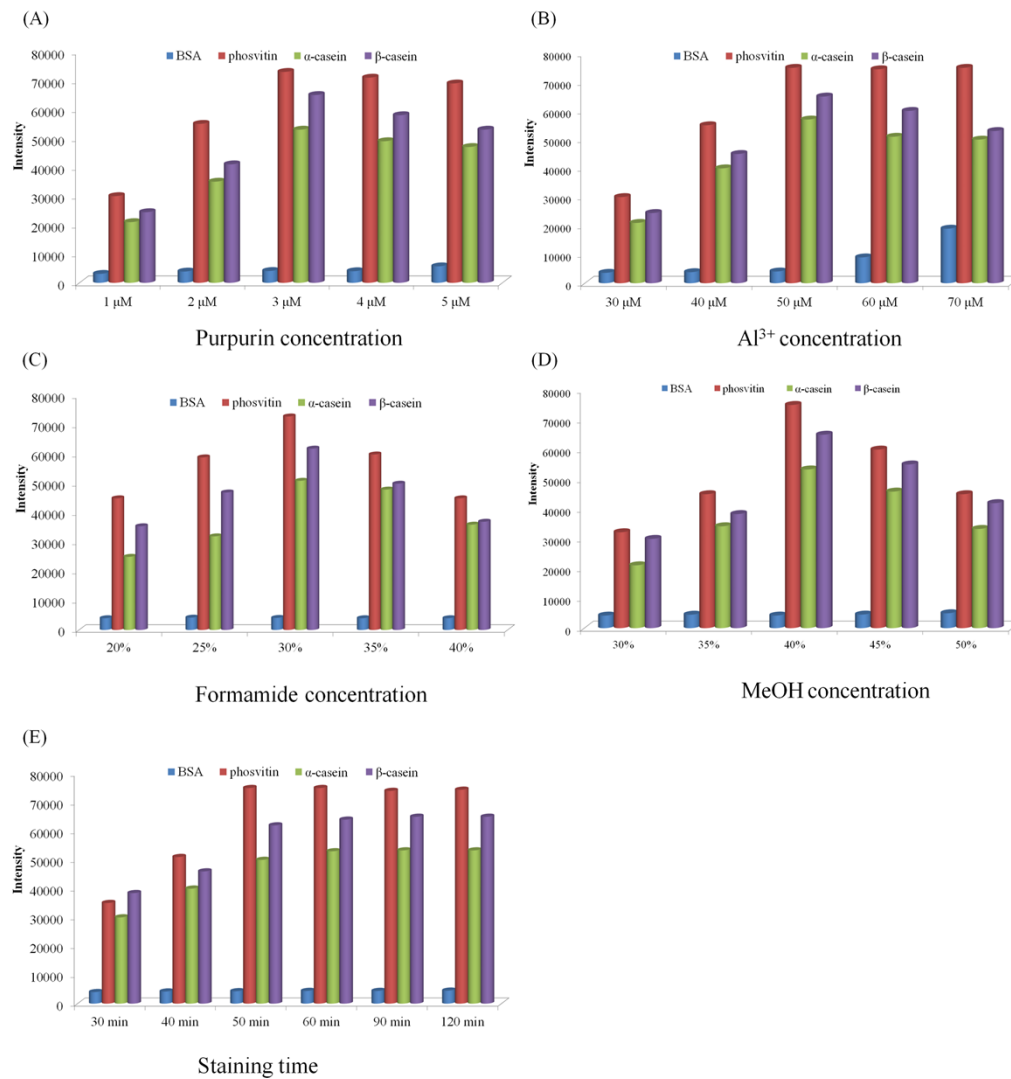

**Supplemental Figure 2.** Optimization of staining conditions. Phosphoprotein bands were quantified by using Image Lab 2010 software program. (A) Optimal purpurin concentration in staining solution. (B) Optimal Al<sup>3+</sup> concentration in staining solution. (C) Optimal formamide concentration in staining solution. (D) Optimal MeOH concentration in staining solution. (E) Optimal staining time.

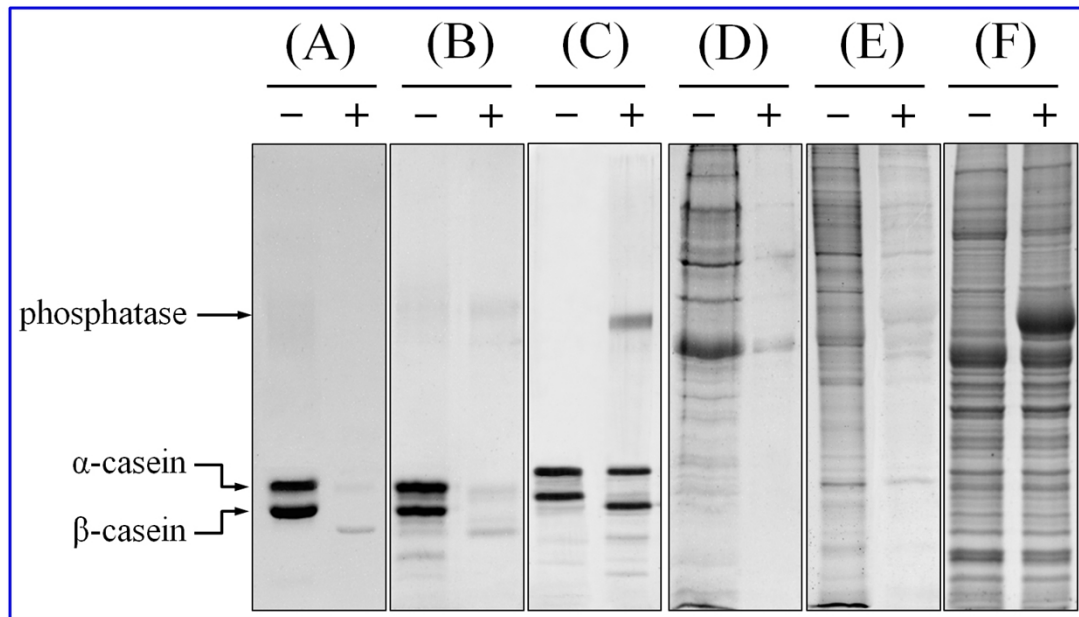

**Supplemental Figure 3.** Specificity comparisons of purpurin stain with Pro-Q Diamond stain for the detection of non-treated phosphoproteins (-) and phosphatase-treated phosphoproteins (+). (A, B, C): marker protein  $\alpha$ -casein and  $\beta$ -casein, (D, E, F): mice brain total proteins. (A, D) purpurin stain, (B, E) Pro-Q Diamond stain; (C, F) SYPRO Ruby stain.

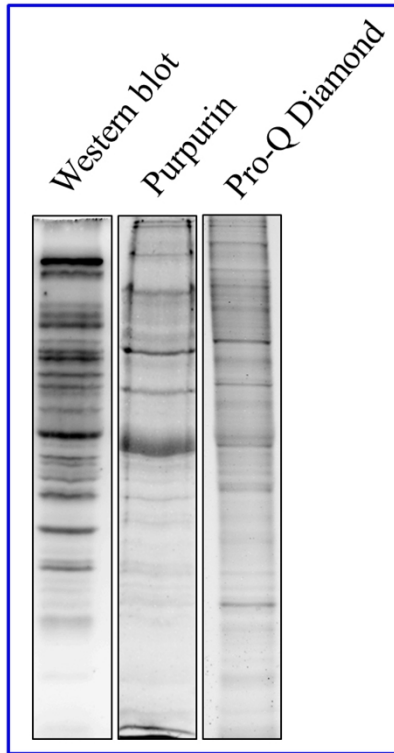

**Supplemental Figure 4.** Specificity comparisons of purpurin stain with western blot and Pro-Q Diamond stain for the detection of mice brain total proteins. For western blot, total proteins were separated by electrophoresis, transferred onto PVDF membrane and immunoblotted using anti-tyrosine antibody.

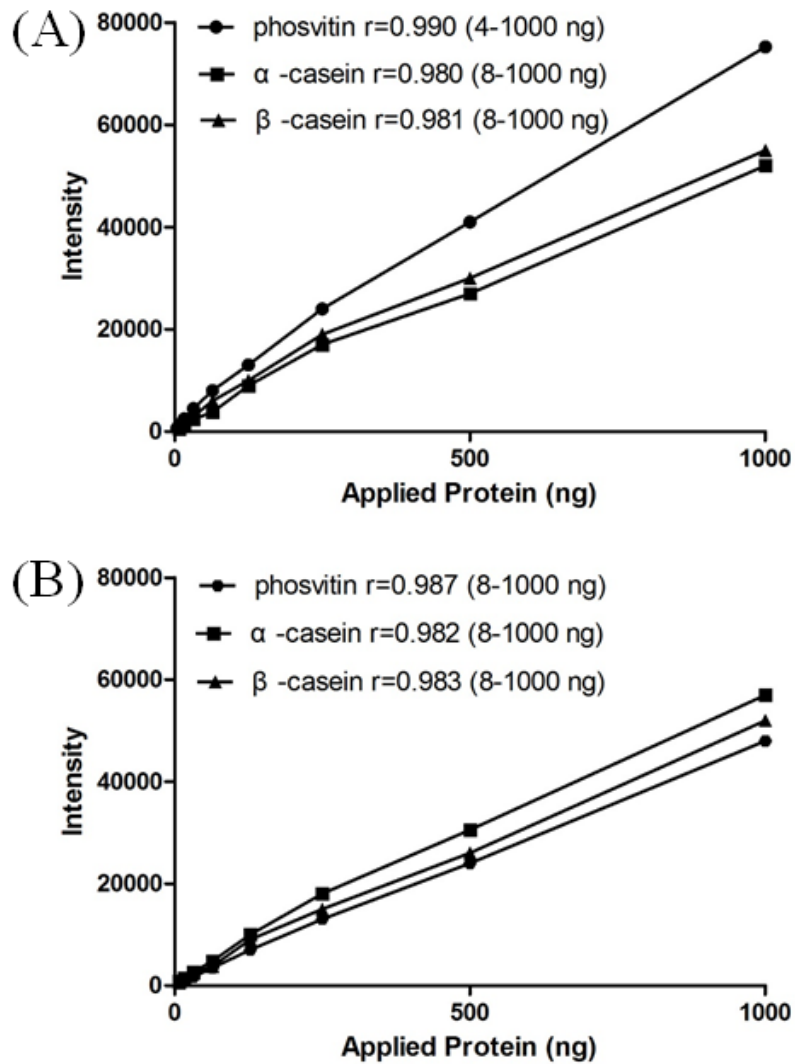

**Supplemental Figure 5.** Comparison of linear dynamic range between purpurin stain (A) and Pro-Q Diamond stain (B). Three representative phosphoproteins,  $\alpha$ -casein,  $\beta$ -casein and phosvitin were separated in 10% polyacrylamide gel. After staining, the protein bands were estimated by software of Image Lab 2010. The range of amount of proteins tested was 4-1000 ng.



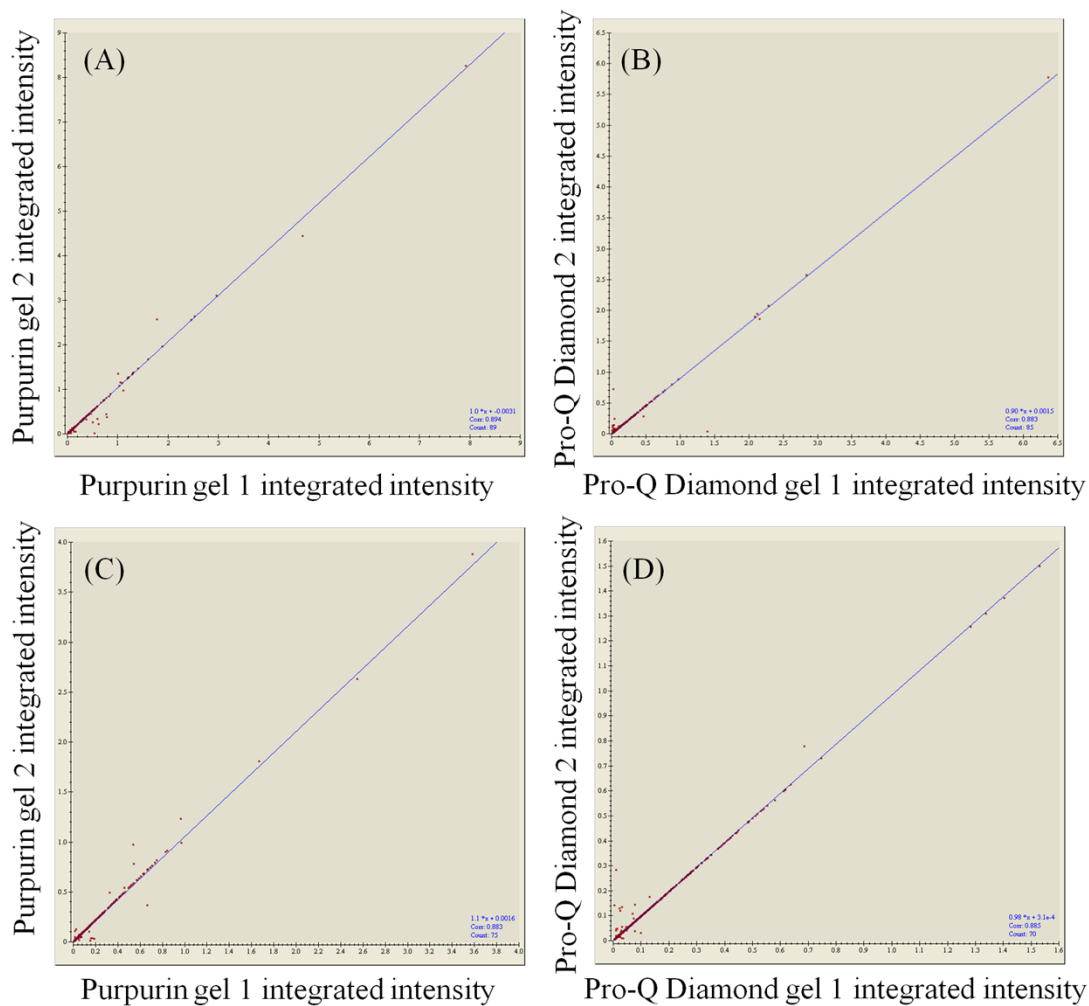

**Supplemental Figure 6.** Quantitative correlation between corresponding matched spots in differently stained gels. (A, B) total proteins from mice brains; (C, D) total proteins from human fibroblasts. (A, C) Purpurin stain: three gels were stained with purpurin and matched with each other. The integrated intensities of matched spots from every gel were plotted against the corresponding matched spots from the other two gels. The average linear correlation coefficient of the line was determined to be 0.894 and 0.883, respectively. (B, D) Pro-Q Diamond stain: three gels were stained with Pro-Q Diamond and matched with each other. The average linear correlation coefficient of the line was determined to be 0.883 and 0.885, respectively.
